# Supplementary material
Source: publisher site journal article supplement (https://www.dovepress.com/article/499326)
Supplement: Supplementary file 1 [file get_supplementary_file.php]

**Supplementary Table 1.** CURB-65 scoring system

| **Clinical feature** | **Points** |
| --- | --- |
| Confusion | 1 |
| Uremia > 7 mmol/L | 1 |
| Respiratory frequency ≥ 30 | 1 |
| Systolic blood pressure ≤ 90 mmHg or diastolic blood pressure ≤ 60 mmHg | 1 |
| Age > 65 (years) | 1 |

| **CURB-65 score** | **Mortality risk** |
| --- | --- |
| < 3 | Low risk |
| ≥ 3 | High risk |

**Supplementary Table 2.** Pneumonia severity index

| **Factor** | **Points** |
| --- | --- |
| **Patient age** |  |
| **Male** | Age |
| **Female** | Age - 10 |
| **Long-term care facility resident** | + 10 |
| **Chronic complication** |  |
| Malignancy | + 30 |
| Liver disease | + 20 |
| Cardiovascular disease | + 10 |
| Cerebrovascular disease | + 10 |
| Renal disease | + 10 |
| **Symptoms at diagnosis** |  |
| Confusion | + 20 |
| Respiratory frequency ≥ 30/min | + 20 |
| Systolic pressure < 90 mmHg | + 15 |
| Body temperature < 35 °C or ≥ 40 °C | + 15 |
| Heart rate ≥ 125/min | + 10 |
| **Laboratory index** |  |
| Arterial blood PH < 7.73 | + 30 |
| Blood urea nitrogen ≥ 30 mg/dL | + 20 |
| Na < 130 mmol/L | + 20 |
| Glucose > 13.89 mmol/L | + 10 |
| Hemoglobin < 9 mg/dL | + 10 |
| Partial pressure of oxygen < 60 mmHg | + 10 |
| Pleural effusion | + 10 |

| **PSI group** | **PSI score** | **Mortality risk** |
| --- | --- | --- |
| I | Age < 50, no underlying disease | Low risk  Low risk  Low risk |
| II | ≤ 70 |
| III | 71–90 |
| IV | 91–130 | Moderate risk  High risk |
| V | > 130 |

**Supplementary Table 3** Comparative analysis of HA levels in different comorbidity subgroups

| **Comorbidities** | **No** | **Yes** | **P-value** |
| --- | --- | --- | --- |
| Hypertension | 102.7 (63.9–154.9) | 107.0 (88.0–136.1) | 0.659 |
| Diabetes mellitus | 100.8 (65.7–140.2) | 112.3 (99.2–148.8) | 0.096 |
| Cardiovascular disease | 101.4 (64.6–139.7) | 115.0 (88.0–155.9) | 0.090 |
| Cerebrovascular disease | 103.7 (67.0–139.1) | 120.9 (86.7–159.3) | 0.175 |
| Liver disease | 104.3 (66.2–149.0) | 112.0 (84.0–138.1) | 0.851 |
| Renal disease | 104.4 (67.9–146.7) | 114.6 (91.3–140.2) | 0.725 |
| Malignancy | 107.0 (70.2–144.7) | 84.0 (79.5–142.3) | 0.979 |

**Notes:** We categorized CAP patients into distinct subgroups based on the presence or absence of various comorbidities. Subsequently, we compared HA levels across these comorbidity-defined subgroups. Data are presented as median (interquartile range).

**Abbreviations:** HA, hyaluronic acid; CAP, community-acquired pneumonia.

**Supplementary Table 4** ROC analysis of HA in predicting SCAP across subgroups

|  | **Subgroups** | **AUC (95% CI)** | **P-value** | **Δ AUC (95% CI)** | **P-value** |
| --- | --- | --- | --- | --- | --- |
| Age | < 65 (n = 57) | 0.757 (0.627-0.886) | < 0.001 | 0.082 (-0.095-0.258) | 0.364 |
| ≥ 65 (n = 78) | 0.675 (0.555-0.795) | 0.004 |
| Sex | Male (n = 79) | 0.731 (0.618-0.843) | < 0.001 | 0.069 (-0.111-0.249) | 0.455 |
| Female (n = 56) | 0.662 (0.521-0.803) | 0.025 |
| BMI | < 24 (n = 79) | 0.734 (0.624-0.845) | < 0.001 | 0.061 (-0.121-0.244) | 0.509 |
| ≥ 24 (n = 56) | 0.673 (0.528-0.818) | 0.019 |
| Smoking | No (n = 93) | 0.718 (0.614-0.823) | < 0.001 | 0.017 (-0.177-0.212) | 0.862 |
| Yes (n = 42) | 0.701 (0.537-0.865) | 0.016 |
| Comorbidities | < 2 (n = 78) | 0.748 (0.633-0.862) | < 0.001 | 0.116 (-0.069-0.301) | 0.218 |
| ≥ 2 (n = 57) | 0.632 (0.486-0.777) | 0.076 |
| Pathogens | Bacteria (n = 47) | 0.688 (0.537-0.839) | 0.015 | 0.034 (-0.153-0.221) | 0.722 |
| Virus (n = 47) | 0.675 (0.510-0.840) | 0.037 | 0.043 (-0.153-0.238) | 0.671 |
| Mixed (n = 41) | 0.754 (0.603-0.904) | 0.001 | 0.067 (-0.252-0.117) | 0.474 |

**Notes:** CAP patients were stratified into subgroups based on age, sex, BMI, smoking habits, comorbidities, and pathogens. ROC analyses were conducted to evaluate the predictive power of HA for SCAP within each subgroup.

**Abbreviations:** ROC, receiver operating characteristic; HA, hyaluronic acid; CAP, community-acquired pneumonia; SCAP, severe CAP; AUC, areas under the curve; CI, confidence interval; BMI, body mass index.


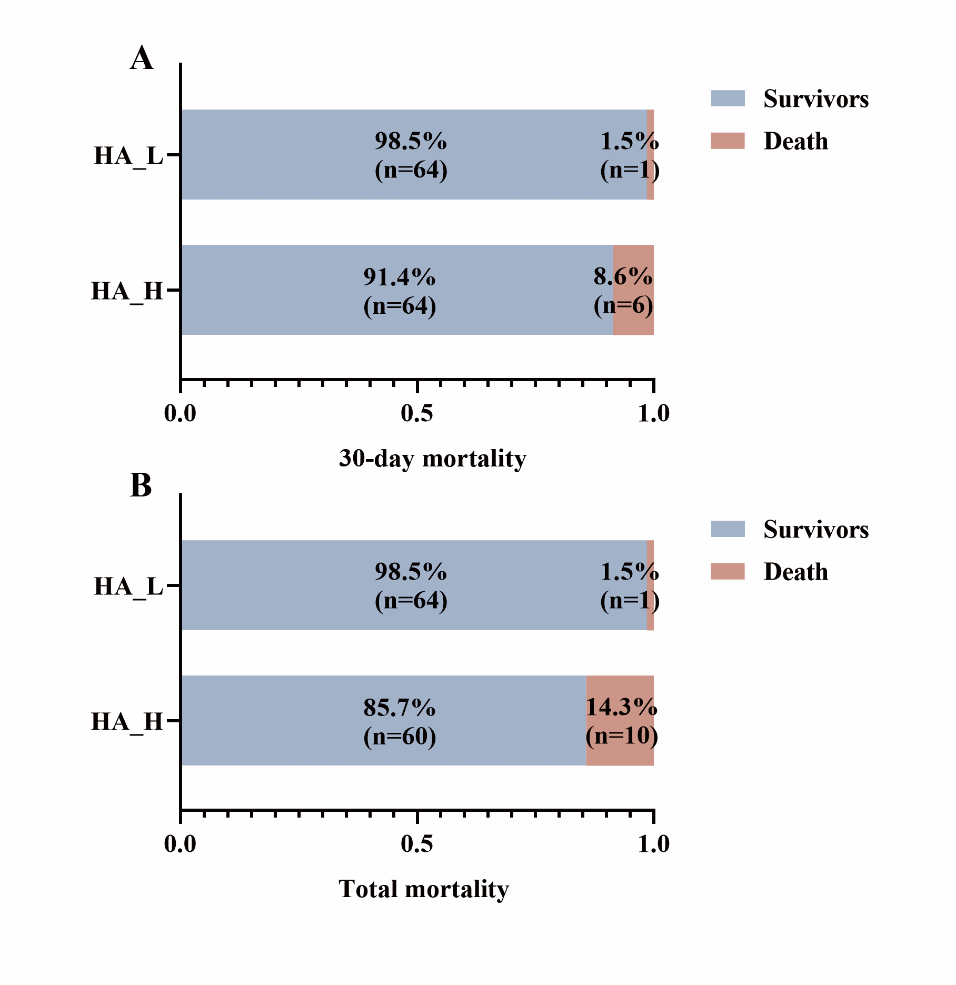


**Supplementary Figure 1:** Distribution of mortality in different HA groups. (A) Distribution of 30-day mortality in patients with different HA levels. (B) Mortality distribution of patients in different HA groups. **Abbreviations:** HA, hyaluronic acid.


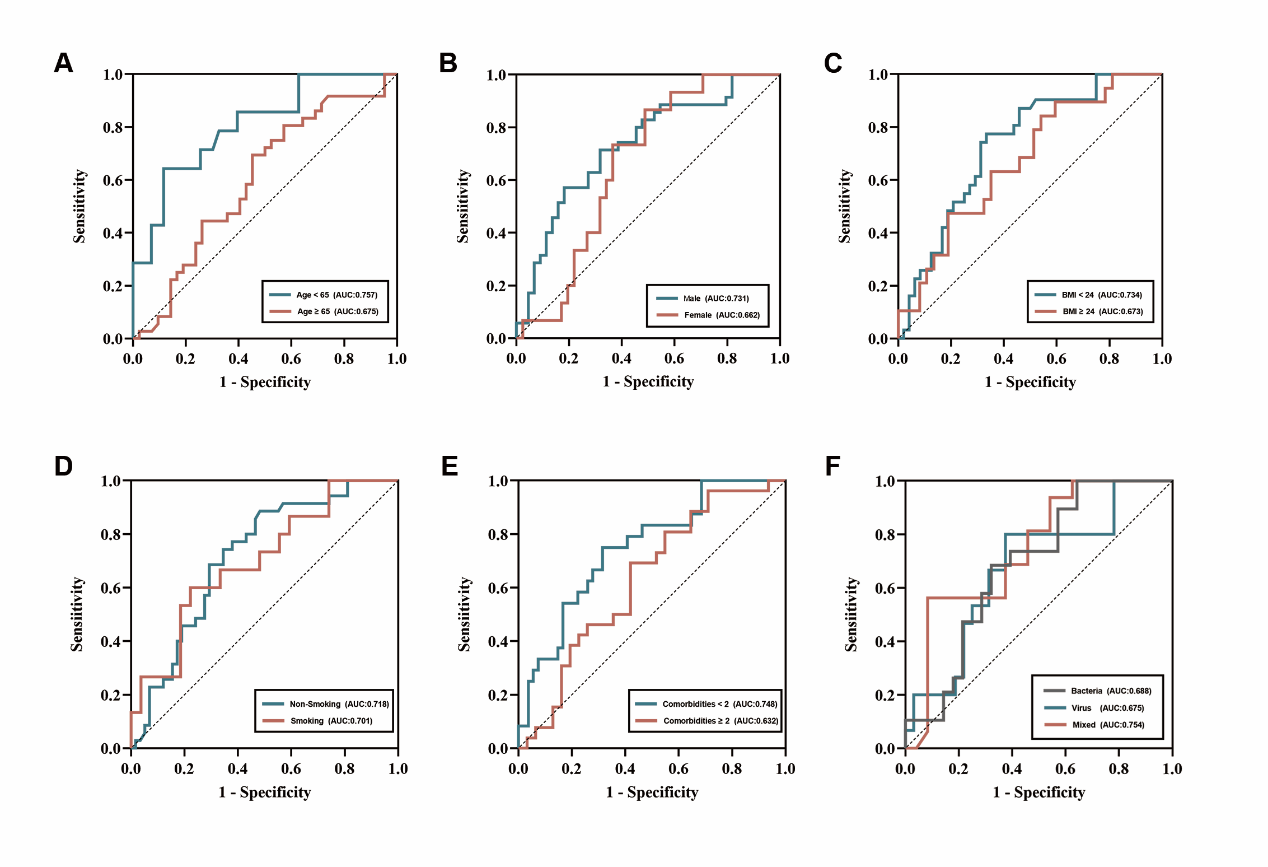


**Supplementary Figure 2.** ROC curve analysis for HA-predicted SCAP across demographic subgroups. This figure presents the results of the ROC analysis assessing the predictive accuracy of HA for SCAP in subgroups defined by (A) age, (B) sex, (C) BMI, (D) smoking habits, (E) comorbidities, and (F) pathogens. **Abbreviations:** ROC, receiver operating characteristic; CAP, community-acquired pneumonia; SCAP, severe CAP; BMI, body mass index; AUC, areas under the curve.

**PASS 15.0.5 2024/11/24 17:29:171**

**One ROC Curve Power Analysis**

**Numeric Results for Testing AUC0 = AUC1 with Continuous Data** Test Type = Two-Sided. FPR1 = 0.00. FPR2 = 1.00. B = 1.00.

| **Power** | **N+** | **N-** | **N** | **AUC0'** | **AUC1'** | **Diff'** | **AUC0** | **AUC1** | **Diff** | **Alpha** |
| --- | --- | --- | --- | --- | --- | --- | --- | --- | --- | --- |
| 0.98857 | 50 | 85 | 135 | 0.5000 | 0.7090 | 0.2090 | 0.5000 | 0.7090 | 0.2090 | 0.050 |
| **References** |  |  |  |  |  |  |  |  |  |  |

Hanley, J. A. and McNeil, B. J. 1983. 'A Method of Comparing the Areas under Receiver Operating Characteristic

Curves Derived from the Same Cases.' Radiology, 148, 839-843. September, 1983.

Obuchowski, N. and McClish, D. 1997. 'Sample Size Determination for Diagnostic Accuracy Studies Involving Binormal ROC Curve Indices.' Statistics in Medicine, 16, pages 1529-1542.

**Report Definitions**

Power is the probability of rejecting a false null hypothesis.

N+ and N- are the number of items sampled from each population. N is the total sample size, N+ + N-.

AUC0' and AUC1' are the adjusted areas under the ROC curve for the null and alternative hypotheses, respectively.

Diff' is AUC1 - AUC0. This is the adjusted difference to be detected.

AUC0 and AUC1 are the actual areas under the ROC curve for the null and alternative hypotheses, respectively. Diff is AUC1 - AUC0. This is the difference to be detected.

Alpha is the probability of rejecting a true null hypothesis.

FPR1, FPR2 are the lower and upper bounds on the false positive rates.

B is the ratio of the standard deviations of the negative and positive groups.

**Summary Statements**

A sample of 50 from the positive group and 85 from the negative group achieves 99% power to detect a difference of 0.2090 between the area under the ROC curve (AUC) under the null hypothesis of 0.5000 and an AUC under the alternative hypothesis of 0.7090 using a two-sided z-test at a significance level of 0.050. The data are continuous responses. The AUC is computed between false positive rates of 0.00 and 1.00. The ratio of the standard deviation of the responses in the negative group to the standard deviation of the responses in the positive group is 1.00.
